# Supplementary material for: Antioxidant Efficacy of a Standardized Red Orange (Citrus sinensis (L.) Osbeck) Extract in Elderly Subjects: A Randomized, Double Blind, Controlled Study
Source: MDPI journal article supplement (doi:10.3390/nu14204235), 2022-10-11
Supplement: s1 [file s1]

## SUPPLEMENTARY INFORMATION

### **Antioxidant Efficacy of a Standardized Red Orange (*Citrus sinensis* (L.) Osbeck) Extract in elderly subjects: A Random-ized, Double Blind, Controlled Study.**

Vincenzo Nobile, Marta Pisati, Enza Cestone, Violetta Insolia, Vincenzo Zaccaria and Giuseppe Antonio Malfa.

**Supplementary Table S1.** Inclusion and exclusion criteria.

| <b>No.</b> | <b>Inclusion criteria</b>                                                                                                                                        |
|------------|------------------------------------------------------------------------------------------------------------------------------------------------------------------|
| 01         | Men (50%) and women (50%) aged 45-60 years old                                                                                                                   |
| 02         | Subjects with menopausal symptoms (only for women)                                                                                                               |
| 03         | Subjects naïve to treatment and food supplement that can interfere with the study treatment for the previous 1 month                                             |
| 04         | Promise to not use during all the study period topic products/food supplements with similar effect to that one of the products to be tested (antioxidant)        |
| 05         | Subjects registered with health social security or health social insurance                                                                                       |
| 06         | Subjects reading, understanding and signed approval of the informative consent                                                                                   |
| 07         | No vegetarian                                                                                                                                                    |
| 08         | Subjects who will continue, expect reserve, their normal lifestyle                                                                                               |
| 09         | Healthy subjects without clinical illness diagnosed with relevant effect on the gastrointestinal system or the motility visceral                                 |
| 10         | No pregnant women (only for women)                                                                                                                               |
| 11         | No smokers                                                                                                                                                       |
| 12         | Subjects available and willing to follow the procedure of the study protocol                                                                                     |
| 13         | Subjects able to understand the language used in the investigation centre and the information given                                                              |
| <b>No.</b> | <b>Exclusion criteria</b>                                                                                                                                        |
| 01         | Subjects who do not fit the inclusion criteria                                                                                                                   |
| 02         | Subjects <45 and >60 years old                                                                                                                                   |
| 03         | Clinical history with relevant presence of any disorder or administration of drugs/food supplement that can potentially interfere with the treatment under study |
| 04         | Lack of compliance defined as not using the correct dose or placebo for >1 week, and inability to give informed consent                                          |
| 05         | Subjects who have changed their diet significantly or have been placed on weight reduction products                                                              |
| 06         | Smokers, obese subjects                                                                                                                                          |
| 07         | Subjects changing the eating habits within the 2 weeks previous the screening                                                                                    |
| 08         | Pregnancy or subjects planning a pregnancy (only for women)                                                                                                      |
| 09         | Breastfeeding (only for women)                                                                                                                                   |
| 10         | Subjects with a history of drug, alcohol, and other substance abuse                                                                                              |
| 11         | Subjects planning to change their lifestyle or physical activity                                                                                                 |
| 12         | Known food intolerance or food allergy                                                                                                                           |
| 13         | Subjects involved in a clinical or food study within the previous month                                                                                          |
| 14         | Subjects who have unstable medical diseases (cardiac arrhythmias or ischemia, uncontrolled hypertension and hypotension, diabetes mellitus, kidney failure)      |
| 15         | Subjects with a history of paralysis or cerebral vascular accident                                                                                               |
| 16         | Subjects with active cancers or on chemotherapy                                                                                                                  |
| 17         | Subjects who have been under diuretics for the previous one months                                                                                               |
| 18         | Other factors that limit their ability to cooperate during the study                                                                                             |
| 19         | Subjects deprived of freedom by administrative or legal decision or under guardianship                                                                           |
| 20         | Subjects not able to be contacted in case of emergency                                                                                                           |
| 21         | Subjects planning a hospitalisation during the study                                                                                                             |

| <u>DAYS (D)</u>                                                               | <u>T0</u> | <u>T2</u> | <u>T8</u> |
|-------------------------------------------------------------------------------|-----------|-----------|-----------|
| Subject information and delivery of the information sheet                     | ✓         |           |           |
| Signature of the informed consent form and photograph authorisation signature | ✓         |           |           |
| Demographics data                                                             | ✓         |           |           |
| Verification of inclusion and non-inclusion criteria                          | ✓         |           |           |
| Randomisation                                                                 | ✓         |           |           |
| Dispensing of daily log (alimentary diary) and investigational products       | ✓         |           |           |
| Efficacy parameters                                                           |           |           |           |
| Glutathione level                                                             | ✓         | ✓         | ✓         |
| D-rom test                                                                    | ✓         | ✓         | ✓         |
| TNF- $\alpha$                                                                 | ✓         | ✓         | ✓         |
| SF-36 Quality-of-Life Scale                                                   | ✓         | ✓         | ✓         |
| Menopause rating scale (only for women)                                       | ✓         | ✓         | ✓         |
| Safety parameters                                                             |           |           |           |
| Complete blood cell count:                                                    |           |           |           |
| WBC                                                                           | ✓         |           | ✓         |
| RBC                                                                           | ✓         |           | ✓         |
| Hb                                                                            | ✓         |           | ✓         |
| Hct                                                                           | ✓         |           | ✓         |
| PLT                                                                           | ✓         |           | ✓         |
| Biochemistry test:                                                            |           |           |           |
| BUN                                                                           | ✓         |           | ✓         |
| Cholesterol                                                                   | ✓         |           | ✓         |
| Albumin                                                                       | ✓         |           | ✓         |
| Total bilirubin                                                               | ✓         |           | ✓         |
| ALP                                                                           | ✓         |           | ✓         |
| r-GT                                                                          | ✓         |           | ✓         |
| Creatinine                                                                    | ✓         |           | ✓         |
| Triglycerides                                                                 | ✓         |           | ✓         |
| HDL-C                                                                         | ✓         |           | ✓         |
| LDL-C                                                                         | ✓         |           | ✓         |
| hs-CRP                                                                        | ✓         |           | ✓         |
| Urinalysis:                                                                   |           |           |           |
| Specific Gravity                                                              | ✓         |           | ✓         |
| pH                                                                            | ✓         |           | ✓         |
| Wbc                                                                           | ✓         |           | ✓         |
| Nitrite                                                                       | ✓         |           | ✓         |
| Protein                                                                       | ✓         |           | ✓         |
| Glucose                                                                       | ✓         |           | ✓         |
| Ketone body                                                                   | ✓         |           | ✓         |
| Urobilinogen                                                                  | ✓         |           | ✓         |
| Bilirubin                                                                     | ✓         |           | ✓         |
| Occult blood (erythrocytes)                                                   | ✓         |           | ✓         |
| ECG (electrocardiography)                                                     | ✓         |           | ✓         |
| Dispensing investigational products                                           | ✓         |           |           |
| Dispensing questionnaires (SF-36) and MRS                                     | ✓         |           |           |
| Retrieve investigational products                                             |           | ✓         | ✓         |
| Retrieve questionnaires (SF-36) and MRS                                       |           | ✓         | ✓         |
| Use of investigational product check                                          |           | ✓         | ✓         |
| Recording reactions (AE, SAE)                                                 |           | ✓         | ✓         |

**Supplementary Figure S1.** Study flow and schedule of assessments chart

**Supplementary Table S2. SF-36 QoL questionnaire.**

Today's date: \_\_\_\_/\_\_\_\_/\_\_\_\_

Vol. ID \_\_\_\_\_

First name: \_\_\_\_\_ Surname: \_\_\_\_\_

| <h2>SF-36 Questionnaire</h2>                                                                                                                                                                                                   |                                                           |                                                           |                                                         |                                                            |                                                        |
|--------------------------------------------------------------------------------------------------------------------------------------------------------------------------------------------------------------------------------|-----------------------------------------------------------|-----------------------------------------------------------|---------------------------------------------------------|------------------------------------------------------------|--------------------------------------------------------|
| For ALL questions, please tick, cross or colour the circle that most closely matches your response. There are no right or wrong answers. Please answer ALL questions.                                                          |                                                           |                                                           |                                                         |                                                            |                                                        |
| <b>1. In general, would you say your health is:</b>                                                                                                                                                                            | Poor<br><input type="radio"/>                             | Fair<br><input type="radio"/>                             | Good<br><input type="radio"/>                           | Very good<br><input type="radio"/>                         | Excellent<br><input type="radio"/>                     |
| <b>2. Compared to one year ago, how would you rate your health general in now?</b>                                                                                                                                             | Much worse now than one year ago<br><input type="radio"/> | Somewhat worse than one year ago<br><input type="radio"/> | About the same as one year ago<br><input type="radio"/> | Somewhat better than one year ago<br><input type="radio"/> | Much better than one year ago<br><input type="radio"/> |
| <b>The following questions are about activities you might do during a typical day. Does your health now limit you in these activities? If so, how much?</b>                                                                    |                                                           |                                                           |                                                         |                                                            |                                                        |
|                                                                                                                                                                                                                                | No, not limited at all                                    | Yes, limited a little                                     | Yes, limited a lot                                      |                                                            |                                                        |
| <b>3. Vigorous activities, such as running, lifting heavy objects, participating in strenuous sports</b>                                                                                                                       | <input type="radio"/>                                     | <input type="radio"/>                                     | <input type="radio"/>                                   |                                                            |                                                        |
| <b>4. Moderate activities, such as moving a table pushing a vacuum cleaner, bowling, or playing</b>                                                                                                                            | <input type="radio"/>                                     | <input type="radio"/>                                     | <input type="radio"/>                                   |                                                            |                                                        |
| <b>5. Lifting or carrying groceries</b>                                                                                                                                                                                        | <input type="radio"/>                                     | <input type="radio"/>                                     | <input type="radio"/>                                   |                                                            |                                                        |
| <b>6. Climbing <u>several</u> flights of stairs</b>                                                                                                                                                                            | <input type="radio"/>                                     | <input type="radio"/>                                     | <input type="radio"/>                                   |                                                            |                                                        |
| <b>7. Climbing <u>one</u> flight of stairs</b>                                                                                                                                                                                 | <input type="radio"/>                                     | <input type="radio"/>                                     | <input type="radio"/>                                   |                                                            |                                                        |
| <b>8. Bending, kneeling or stooping</b>                                                                                                                                                                                        | <input type="radio"/>                                     | <input type="radio"/>                                     | <input type="radio"/>                                   |                                                            |                                                        |
| <b>9. Walking more than a mile</b>                                                                                                                                                                                             | <input type="radio"/>                                     | <input type="radio"/>                                     | <input type="radio"/>                                   |                                                            |                                                        |
| <b>10. Walking several blocks</b>                                                                                                                                                                                              | <input type="radio"/>                                     | <input type="radio"/>                                     | <input type="radio"/>                                   |                                                            |                                                        |
| <b>11. Walking one block</b>                                                                                                                                                                                                   | <input type="radio"/>                                     | <input type="radio"/>                                     | <input type="radio"/>                                   |                                                            |                                                        |
| <b>12. Bathing or dressing yourself</b>                                                                                                                                                                                        | <input type="radio"/>                                     | <input type="radio"/>                                     | <input type="radio"/>                                   |                                                            |                                                        |
| <b>During the past 4 weeks, how much of the time have you had any of the following problems with your work or other daily activities as a result of your physical health?</b>                                                  |                                                           |                                                           |                                                         |                                                            |                                                        |
|                                                                                                                                                                                                                                | None of the time                                          | A little of the time                                      | Some of the time                                        | Most of the time                                           | All of the time                                        |
| <b>13. Cut down on the amount of time you spent on work or other activities</b>                                                                                                                                                | <input type="radio"/>                                     | <input type="radio"/>                                     | <input type="radio"/>                                   | <input type="radio"/>                                      | <input type="radio"/>                                  |
| <b>14. Accomplished less than you would like</b>                                                                                                                                                                               | <input type="radio"/>                                     | <input type="radio"/>                                     | <input type="radio"/>                                   | <input type="radio"/>                                      | <input type="radio"/>                                  |
| <b>15. Were limited in the kind of work or other activities</b>                                                                                                                                                                | <input type="radio"/>                                     | <input type="radio"/>                                     | <input type="radio"/>                                   | <input type="radio"/>                                      | <input type="radio"/>                                  |
| <b>16. Had difficulty performing the work or other activities (e.g., it took extra effort)</b>                                                                                                                                 | <input type="radio"/>                                     | <input type="radio"/>                                     | <input type="radio"/>                                   | <input type="radio"/>                                      | <input type="radio"/>                                  |
| <b>During the past 4 weeks, how much of the time have you had any of the following problems with your work or other regular daily activities as a result of any emotional problems (such as feeling depressed or anxious)?</b> |                                                           |                                                           |                                                         |                                                            |                                                        |
|                                                                                                                                                                                                                                | None of the time                                          | A little of the time                                      | Some of the time                                        | Most of the time                                           | All of the time                                        |
| <b>17. Cut down on the amount of time you spent on work or other activities</b>                                                                                                                                                | <input type="radio"/>                                     | <input type="radio"/>                                     | <input type="radio"/>                                   | <input type="radio"/>                                      | <input type="radio"/>                                  |
| <b>18. Accomplished less than you would like</b>                                                                                                                                                                               | <input type="radio"/>                                     | <input type="radio"/>                                     | <input type="radio"/>                                   | <input type="radio"/>                                      | <input type="radio"/>                                  |
| <b>19. Did work or other activities less carefully than usual</b>                                                                                                                                                              | <input type="radio"/>                                     | <input type="radio"/>                                     | <input type="radio"/>                                   | <input type="radio"/>                                      | <input type="radio"/>                                  |
| <b>20. During the past 4 weeks, to what extent has your physical health or emotional problems interfered with your normal social activities with family, friends, neighbors, or groups?</b>                                    | Not at all<br><input type="radio"/>                       | Slightly<br><input type="radio"/>                         | Moderately<br><input type="radio"/>                     | Quite a bit<br><input type="radio"/>                       | All of the time<br><input type="radio"/>               |

---> continue on next page

---> to be continued

|                                                                                                                                                                                                                                                      |                       |                           |                       |                       |                      |                  |
|------------------------------------------------------------------------------------------------------------------------------------------------------------------------------------------------------------------------------------------------------|-----------------------|---------------------------|-----------------------|-----------------------|----------------------|------------------|
| <b>21. How much bodily pain have you had during the past 4 weeks?</b>                                                                                                                                                                                | None<br>○             | Very mild<br>○            | Mild<br>○             | Moderate<br>○         | Severe<br>○          | Very severe<br>○ |
| <b>22. During the past 4 weeks, how much did pain interfere with your normal work (including both work outside the home and housework)?</b>                                                                                                          | Not at all<br>○       | A little bit<br>○         | Moderately<br>○       | Quite a bit<br>○      | Extremely<br>○       |                  |
| These questions are about how you feel and how things have been with you during the past 4 weeks. For each question, please give the one answer that comes closest to the way you have been feeling. How much of the time during the past 4 weeks... |                       |                           |                       |                       |                      |                  |
|                                                                                                                                                                                                                                                      | None of the time<br>○ | A little of the time<br>○ | Some of the time<br>○ | Most of the time<br>○ | All of the time<br>○ |                  |
| <b>23. did you feel full of life?</b>                                                                                                                                                                                                                | ○                     | ○                         | ○                     | ○                     | ○                    |                  |
| <b>24. have you been very nervous?</b>                                                                                                                                                                                                               | ○                     | ○                         | ○                     | ○                     | ○                    |                  |
| <b>25. have you felt so down in the dumps that nothing could cheer you up?</b>                                                                                                                                                                       | ○                     | ○                         | ○                     | ○                     | ○                    |                  |
| <b>26. have you felt calm and peaceful?</b>                                                                                                                                                                                                          | ○                     | ○                         | ○                     | ○                     | ○                    |                  |
| <b>27. did you have a lot of energy?</b>                                                                                                                                                                                                             | ○                     | ○                         | ○                     | ○                     | ○                    |                  |
| <b>28. have you felt downhearted and depressed?</b>                                                                                                                                                                                                  | ○                     | ○                         | ○                     | ○                     | ○                    |                  |
| <b>29. did you feel worn out?</b>                                                                                                                                                                                                                    | ○                     | ○                         | ○                     | ○                     | ○                    |                  |
| <b>30. have you been happy?</b>                                                                                                                                                                                                                      | ○                     | ○                         | ○                     | ○                     | ○                    |                  |
| <b>31. did you feel tired?</b>                                                                                                                                                                                                                       | ○                     | ○                         | ○                     | ○                     | ○                    |                  |
| <b>32. During the past 4 weeks, how much of the time has your physical health or emotional problems interfered with your social activities (like visiting friends, relatives, etc.)?</b>                                                             | None of the time<br>○ | A little of the time<br>○ | Some of the time<br>○ | Most of the time<br>○ | All of the time<br>○ |                  |
| <b>How TRUE or FALSE is each of the following statements for you?</b>                                                                                                                                                                                |                       |                           |                       |                       |                      |                  |
|                                                                                                                                                                                                                                                      | Definitely false<br>○ | Mostly false<br>○         | Don't know<br>○       | Mostly true<br>○      | Definitely true<br>○ |                  |
| <b>33. I seem to get sick a little easier than other people</b>                                                                                                                                                                                      | ○                     | ○                         | ○                     | ○                     | ○                    |                  |
| <b>34. I am as healthy as anybody I know</b>                                                                                                                                                                                                         | ○                     | ○                         | ○                     | ○                     | ○                    |                  |
| <b>35. I expect my health to get worse</b>                                                                                                                                                                                                           | ○                     | ○                         | ○                     | ○                     | ○                    |                  |
| <b>36. My health is excellent</b>                                                                                                                                                                                                                    | ○                     | ○                         | ○                     | ○                     | ○                    |                  |

**Supplementary Table S3.** Menopause Rating Scale (MRS).

Today's date: \_\_\_\_/\_\_\_\_/\_\_\_\_

Vol. ID \_\_\_\_\_

First name: \_\_\_\_\_ Surname: \_\_\_\_\_

## Menopause Rating Scale (MRS) Questionnaire

Which of the following symptoms apply to you at this time? (X ONE Box For EACH Symptom). For Symptoms That Do Not Apply, Please Mark "None").

|                                                                                                                                | None                  | Mild                  | Moderate              | Severe                | Extremely<br>severe   |
|--------------------------------------------------------------------------------------------------------------------------------|-----------------------|-----------------------|-----------------------|-----------------------|-----------------------|
| Score=                                                                                                                         | 0                     | 1                     | 2                     | 3                     | 4                     |
| 1. Hot flashes, sweating (episodes of sweating)                                                                                | <input type="radio"/> |
| 2. Heart discomfort (unusual awareness of heart beat, heart skipping, heart racing, tightness)                                 | <input type="radio"/> |
| 3. Sleep problems (difficulty in falling asleep, difficulty in sleeping through the night, waking up early)                    | <input type="radio"/> |
| 4. Depressive mood (feeling down, sad, on the verge of tears, lack of drive, mood swings)                                      | <input type="radio"/> |
| 5. Irritability (feeling nervous, inner tension, feeling aggressive)                                                           | <input type="radio"/> |
| 6. Anxiety (inner restlessness, feeling panicky)                                                                               | <input type="radio"/> |
| 7. Physical and mental exhaustion (general decrease in performance, impaired memory, decrease in concentration, forgetfulness) | <input type="radio"/> |
| 8. Sexual problems (change in sexual desire, in sexual activity and satisfaction)                                              | <input type="radio"/> |
| 9. Bladder problems (difficulty in urinating, increased need to urinate, bladder incontinence)                                 | <input type="radio"/> |
| 10. Dryness of vagina (sensation of dryness or burning in the vagina, difficulty with sexual intercourse)                      | <input type="radio"/> |
| 11. Joint and muscular discomfort (pain in the joints, rheumatoid complaints)                                                  | <input type="radio"/> |

**Supplementary Table S4.** Subjects' baseline demographic and clinical characteristics.

|                                  |                  | Active     | Placebo    | Units               |
|----------------------------------|------------------|------------|------------|---------------------|
| Sex                              | Male, % (n)      | 50 (15)    | 50 (15)    | % (no.)             |
|                                  | Female, % (n)    | 50 (15)    | 50 (15)    | % (no.)             |
| GSH                              |                  | 949.4±63.9 | 897.4±57.1 | μM                  |
| GSSG                             |                  | 362.4±16.7 | 350.6±16.4 | μM                  |
| GSH/GSSG                         |                  | 2.7±0.2    | 2.7±0.2    | Ratio               |
| d-ROMS                           |                  | 392.3±15.5 | 398.6±13.1 | U.CARR              |
| Serum TNF-α levels               |                  | 7.19±0.07  | 7.32±0.10  | pg/mL               |
| <b>Complete blood cell count</b> |                  |            |            |                     |
|                                  | WBC              | 6.6±0.3    | 6.6±0.3    | 10 <sup>3</sup> /μL |
|                                  | RBC              | 4.8±0.1    | 4.9±0.1    | 10 <sup>6</sup> /μL |
|                                  | Hb               | 14.4±0.2   | 14.0±0.3   | g/dl                |
|                                  | Hct              | 42.0±0.6   | 41.2±0.8   | %                   |
|                                  | PLT              | 234.4±9.5  | 223.7±12.2 | 10 <sup>3</sup> /μL |
| <b>Biochemistry test</b>         |                  |            |            |                     |
|                                  | BUN              | 35.6±1.5   | 38.6±1.4   | mg/dl               |
|                                  | Cholesterol      | 207.0±9.0  | 208.7±6.2  | mg/dl               |
|                                  | HDL-C            | 76.7±4.6   | 66.2±2.7   | mg/dl               |
|                                  | LDL-C            | 114.2±8.0  | 130.8±6.4  | mg/dl               |
|                                  | Triglycerides    | 109.7±7.6  | 105.5±5.7  | mg/dl               |
|                                  | Albumin          | 4.6±0.1    | 4.6±0.0    | g/dl                |
|                                  | Total bilirubin  | 0.7±0.1    | 0.6±0.1    | mg/dl               |
|                                  | ALP              | 73.1±3.8   | 75.3±4.2   | U/L                 |
|                                  | r-GT             | 23.5±2.8   | 20.7±2.1   | U/L                 |
|                                  | Creatinine       | 0.85±0.03  | 0.81±0.04  | mg/dl               |
|                                  | hs-CRP           | 2.1±0.3    | 1.9±0.3    | mg/l                |
| <b>Urinalysis</b>                |                  |            |            |                     |
|                                  | Specific Gravity | 1.02±0.00  | 1.02±0.00  | g/L                 |
|                                  | pH               | 5.6±0.1    | 5.6±0.1    | ---                 |
|                                  | WBC              | 17.0±5.2   | 20.2±7.0   | μL                  |
|                                  | Erythrocytes     | 9.0±2.1    | 13.8±2.9   | μL                  |
|                                  | Nitrite          | Absent     | Absent     | ---                 |
|                                  | Protein          | Absent     | Absent     | ---                 |
|                                  | Glucose          | Absent     | Absent     | ---                 |
|                                  | Ketone body      | Absent     | Absent     | ---                 |
|                                  | Urobilinogen     | Absent     | Absent     | ---                 |
|                                  | Bilirubin        | Absent     | Absent     | ---                 |

Data are average (± standard error) or number of subjects (n or %). Legend. WBC White Blood Cells; RBC Red Blood cells; Hb Hemoglobin; Hct Hematocrit; PLT Platelet count; BUN Blood Urea Nitrogen, Azotemia; HDL-C High-Density Lipoprotein Cholesterol; LDL-C Low-Density Lipoprotein Cholesterol; ALP Alkaline Phosphatase; r-GT Gamma-glutamyl Transferase; hs-CRP High-sensitivity C-reactive Protein; WBC White Blood Cells, Leukocytes; Occult blood erythrocytes.

**Supplementary Table S5.** Blood and Urine analysis in the **active** treatment arm. WBC White Blood Cells; RBC Red Blood cells; Hb Hemoglobin; Hct Hematocrit; PLT Platelet count; BUN Blood Urea Nitrogen, azotemia; HDL-C High-Density Lipoprotein Cholesterol; LDL-C Low-Density Lipoprotein Cholesterol; ALP Alkaline Phosphatase; r-GT Gamma-glutamyl Transferase; hs-CRP High-sensitivity C-reactive Protein; WBC White Blood Cells, leukocytes.

|                                   | Parameter        | T0        | T8        | Normality range | units               |
|-----------------------------------|------------------|-----------|-----------|-----------------|---------------------|
| Complete blood cell count (n=29*) | WBC              | 6.6±0.3   | 6.7±0.3   | 4.00 - 9.0      | 10 <sup>3</sup> /μL |
|                                   | RBC              | 4.8±0.1   | 4.8±0.1   | 3.80 - 5.30     | 10 <sup>6</sup> /μL |
|                                   | Hb               | 14.4±0.2  | 14.3±0.2  | 12.0 - 18.0     | g/dl                |
|                                   | Hct              | 42.0±0.6  | 42.1±0.7  | 36.0 - 56.0     | %                   |
|                                   | PLT              | 234.4±9.5 | 242.3±8.3 | 120.0 - 380.0   | 10 <sup>3</sup> /μL |
| Biochemistry test (n=29*)         | BUN              | 35.6±1.5  | 32.6±1.4  | 10 - 50         | mg/dl               |
|                                   | Cholesterol      | 207.0±9.0 | 204.5±7.0 | 140 - 200       | mg/dl               |
|                                   | HDL-C            | 76.7±4.6  | 81.6±5.7  | > 45            | mg/dl               |
|                                   | LDL-C            | 114.2±8.0 | 114.2±5.9 | 0 - 135         | mg/dl               |
|                                   | Triglycerides    | 109.7±7.6 | 105.8±8.1 | 0 - 200         | mg/dl               |
|                                   | Albumin          | 4.6±0.1   | 4.6±0.1   | 3.5 - 5.5       | g/dl                |
|                                   | Total bilirubin  | 0.7±0.1   | 0.6±0.1   | 0.0 - 1.20      | mg/dl               |
|                                   | ALP              | 73.1±3.8  | 76.4±4.5  | 45 - 98         | U/L                 |
|                                   | r-GT             | 23.5±2.8  | 23.5±2.7  | 5 - 36          | U/L                 |
| Urinalysis (n=29*)                | Creatinine       | 0.85±0.03 | 0.83±0.03 | 0.50 - 0.90     | mg/dl               |
|                                   | hs-CRP           | 2.1±0.3   | 2.4±0.4   | 0.0 - 5.00      | mg/l                |
|                                   | Specific Gravity | 1.02±0.00 | 1.02±0.00 | 1.01 - 1.025    | g/L                 |
|                                   | pH               | 5.6±0.1   | 5.7±0.1   | 5.0 - 7.5       | ---                 |
|                                   | WBC              | 17.0±5.2  | 17.0±7.0  | 0 - 25          | mL                  |
|                                   | Erythrocytes     | 9.0±2.1   | 15.6±5.9  | 0 - 30          | mL                  |
|                                   | Nitrite          | Absent    | Absent    | Absent          | ---                 |
|                                   | Protein          | Absent    | Absent    | Absent          | ---                 |
|                                   | Glucose          | Absent    | Absent    | Absent          | mg/dl               |
|                                   | Ketone body      | Absent    | Absent    | Absent          | ---                 |
|                                   | Urobilinogen     | Absent    | Absent    | Absent          | ---                 |
|                                   | Bilirubin        | Absent    | Absent    | Absent          | ---                 |

\* The basal analysis of subject no. 26 (in the active treatment arm) was lost.



**Supplementary Table. S6** Blood and Urine analysis in the **placebo** treatment arm. WBC White Blood Cells; RBC Red Blood cells; Hb Hemoglobin; Hct Hematocrit; PLT Platelet count; BUN Blood Urea Nitrogen, azotemia; HDL-C High-Density Lipoprotein Cholesterol; LDL-C Low-Density Lipoprotein Cholesterol; ALP Alkaline Phosphatase; r-GT Gamma-glutamyl Transferase; hs-CRP High-sensitivity C-reactive Protein; WBC White Blood Cells, leukocytes.

|                                  | Parameter        | T0         | T8         | Normality range | units               |
|----------------------------------|------------------|------------|------------|-----------------|---------------------|
| Complete blood cell count (n=30) | WBC              | 6.6±0.3    | 6.6±0.3    | 4.00 - 9.0      | 10 <sup>3</sup> /μL |
|                                  | RBC              | 4.9±0.1    | 5.0±0.1    | 3.80 - 5.30     | 10 <sup>6</sup> /μL |
|                                  | Hb               | 14.0±0.3   | 14.0±0.3   | 12.0 - 18.0     | g/dl                |
|                                  | Hct              | 41.2±0.8   | 41.6±0.8   | 36.0 - 56.0     | %                   |
|                                  | PLT              | 223.7±12.2 | 227.1±11.5 | 120.0 - 380.0   | 10 <sup>3</sup> /μL |
| Biochemistry test (n=30)         | BUN              | 38.6±1.4   | 34.2±1.6   | 10 - 50         | mg/dl               |
|                                  | Cholesterol      | 208.7±6.2  | 204.4±4.4  | 140 - 200       | mg/dl               |
|                                  | HDL-C            | 66.2±2.7   | 72.6±2.8   | > 45            | mg/dl               |
|                                  | LDL-C            | 130.8±6.4  | 115.3±5.0  | 0 - 135         | mg/dl               |
|                                  | Triglycerides    | 105.5±5.7  | 114.2±5.3  | 0 - 200         | mg/dl               |
|                                  | Albumin          | 4.6±0.0    | 4.5±0.1    | 3.5 - 5.5       | g/dl                |
|                                  | Total bilirubin  | 0.6±0.1    | 0.6±0.1    | 0.0 - 1.20      | mg/dl               |
|                                  | ALP              | 75.3±4.2   | 77.6±3.6   | 45 - 98         | U/L                 |
|                                  | r-GT             | 20.7±2.1   | 21.1±2.1   | 5 - 36          | U/L                 |
| Urinalysis (n=30)                | Creatinine       | 0.81±0.04  | 0.78±0.03  | 0.50 - 0.90     | mg/dl               |
|                                  | hs-CRP           | 1.9±0.3    | 2.2±0.3    | 0.0 - 5.00      | mg/l                |
|                                  | Specific Gravity | 1.02±0.00  | 1.02±0.00  | 1.01 - 1.025    | g/L                 |
|                                  | pH               | 5.6±0.1    | 5.7±0.1    | 5.0 - 7.5       | ---                 |
|                                  | WBC              | 20.2±7.0   | 18.8±8.5   | 0 - 25          | mL                  |
|                                  | Erythrocytes     | 13.8±2.9   | 9.4±2.1    | 0 - 30          | mL                  |
|                                  | Nitrite          | Absent     | Absent     | Absent          | ---                 |
|                                  | Protein          | Absent     | Absent     | Absent          | ---                 |
|                                  | Glucose          | Absent     | Absent     | Absent          | mg/dl               |
|                                  | Ketone body      | Absent     | Absent     | Absent          | ---                 |
|                                  | Urobilinogen     | Absent     | Absent     | Absent          | ---                 |
|                                  | Bilirubin        | Absent     | Absent     | Absent          | ---                 |
